# Supplementary material for: Focused electron beam based direct-write fabrication of graphene and amorphous carbon from oxo-functionalized graphene on silicon dioxide
Source: Royal Society of Chemistry journal article supplement (doi:10.1039/c6cp08070g), 2016-12-21
Supplement: c6cp08070g1.pdf [file c6cp08070g1.pdf]

## Supporting Information

### Focused Electron Beam based Direct-Write Fabrication of Graphene and Amorphous Carbon from Oxo-Functionalized Graphene on Silicon Dioxide

Severin Schindler,<sup>a,§</sup> Florian Vollnhals<sup>c,†,§</sup>, Christian E. Halbig,<sup>c</sup> Hubertus Marbach,<sup>d</sup> Hans-Peter Steinrück<sup>d</sup>, Christian Papp<sup>\*,d</sup>, and Siegfried Eigler<sup>\*,a,b,c</sup>

---

<sup>a.</sup> *Freie Universität Berlin, Institute of Chemistry and Pharmacy, Takustraße 3, 14195 Berlin, Germany. E-mail: Siegfried.eigler@fu-berlin.de; Tel: +49 (0)30 838 61851.*

<sup>b.</sup> *Department of Chemistry and Chemical Engineering, Chalmers University of Technology, Kemivägen 10, 41258 Göteborg, Sweden.*

<sup>c.</sup> *Department of Chemistry and Pharmacy and Institute of Advanced Materials and Processes (ZMP), Friedrich-Alexander-Universität Erlangen-Nürnberg (FAU), Dr.-Mack Str. 81, 90762 Fürth, Germany.*

<sup>d.</sup> *Department of Chemistry and Pharmacy, Friedrich-Alexander-Universität Erlangen-Nürnberg (FAU), Egerlandstraße 1, 91058 Erlangen, Germany.*

<sup>†</sup> Present address: Advanced Instrumentation for Ion Nano-Analytics (AINA), Luxembourg Institute of Science and Technology (LIST), 41 rue du Brill, L-4422 Belvaux, Luxembourg.

<sup>§</sup> S. Schindler and F. Vollnhals contributed equally to this work.

<sup>\*</sup> email: [christian.papp@fau.de](mailto:christian.papp@fau.de), [siegfried.eigler@fu-berlin.de](mailto:siegfried.eigler@fu-berlin.de)

## Materials and Methods

Graphite grade 3061 has been provided from Asbury Graphite Mills (USA). Potassium permanganate, concentrated sulfuric acid, hydrogen peroxide and sodium borohydride were purchased from Sigma Aldrich® (Germany). Double distilled water was obtained from Carl Roth® (Germany). All chemicals were used as obtained.

Ultrasonication was performed using a tip sonotrode from Bandelin, Germany, HD 3200, MS 73. Centrifugation was done with Sigma 4K15 centrifuge equipped with both 80 mL (21,000 RCF) and 200 mL beakers (13,000 RCF).

### Preparation of oxo-G

Oxo-G dispersion was prepared according to the previously described procedure.<sup>[S1],[S2],[S3]</sup> Graphite (1 g; 83.33 mmol) was dispersed in 24 mL of cold (< 10 °C) sulfuric acid (98 %) and reacted over night with potassium permanganate (2 g, 12.66 mmol). The potassium permanganate was slowly added to the graphite dispersion over a total time of 4 h and the reaction temperature was kept below 10 °C. In the next step 20 mL of diluted sulfuric acid (20 %) were slowly and continuous added over one hour. After that, doubly distilled water (100 mL, 16 hours) followed by hydrogen peroxide solution (40 mL, 5%, 0.5 h) were added. The obtained dispersion was washed by centrifugation and redispersion 6 times with water (10 min at 1,500 RCF). The pH of the final supernatant was neutral. Delamination was performed by 4 min of pulsed tip sonication (20 W; 2 s on 2 s off). The obtained dispersion was centrifuged 3 times (5 min at 1,500 RCF) to remove aggregated particles and then centrifuged at 13,000 RCF for 45 min to remove major amounts of nano-sized particles (supernatant removed). The temperature during purification process was around 25-30 °C what led to introduction of few defects (around 1% density of defects, derived from statistical Raman spectroscopy:  $I_D/I_G=1.5\pm0.7$ ;  $\Gamma_{2D}=66\pm19$ ).

FTIR spectra are as previously published, see literature.<sup>[S4]</sup>

TGA-MS data of the sample is presented in recent literature and in agreement with previous results justifying the chemical sketch of Figure 2A.<sup>[S3]</sup>

Elemental combustion analysis of the sample is given in ref. S3: C, 45%; N, 0.0%; H, 2.4%; S, 4.3%.

### Preparation of films of flakes of oxo-G

Films of flakes of oxo-G on Si wafers with 300 nm grown SiO<sub>2</sub> surface were prepared by Langmuir-Blodgett technique, as described before.<sup>[S5]</sup>

### Statistical Raman spectroscopy (SRS) and Statistical Raman microscopy (SRM)

Raman spectra were recorded in the wavenumber range from 800 cm<sup>-1</sup> to 3300 cm<sup>-1</sup> using the confocal Raman spectrometer "LabRAM HR Evolution" (Horiba, Japan) (excitation wavelength = 532 nm). Spectra were recorded using a 100x objective (with a numerical aperture of 0.9). For statistical Raman spectroscopy (SRS) a motorized table (Märzhäuser, Germany) was used to generate two-dimensional maps. The scanning increment was 75 nm in x- and y-direction (below the optical resolution) for imaging (SRM). The full-width at half-maximum (FWHM,  $\Gamma$ ) of the D-, G- and 2D-Raman bands were determined by the fit with single Lorentz-functions. For the determination of the density of lattice defects > 2000 spectra with an increment of scanning of 3  $\mu$ m was used (SRS).<sup>[S6]</sup>

**Table S1: BSE Simulation Data**

| Primary Energy [keV] | BSE yield | R <sub>99%</sub> [nm] | A <sub>99%</sub> [μm <sup>2</sup> ] |
|----------------------|-----------|-----------------------|-------------------------------------|
| 2                    | 15.0 %    | 60                    | 0.01                                |
| 5                    | 12.7 %    | 260                   | 0.22                                |
| 10                   | 13.2 %    | 870                   | 2.35                                |
| 15                   | 15.8 %    | 1850                  | 10.8                                |
| 20                   | 16.1 %    | 3450                  | 28.8                                |
| 30                   | 16.4 %    | 7160                  | 122                                 |

**Table S1:** Simulation of backscattered electrons using CASINO v2.42. Sample setup: 300 nm SiO<sub>2</sub> on Si, 10<sup>6</sup> electrons. R<sub>99%</sub> and A<sub>99%</sub> are the radius/area within which 99% of BSE's are emitted. BSEs exit closer to the point of impact of the primary beam for lower primary energies which leads to a higher density of secondary electrons type 2 (SE<sub>II</sub>). High densities of SEs correlate with the formation of lattice defects in oxo-G, while at low densities reduction of oxo-G to a grapheme-like material is observed in Raman spectroscopy.

**Figure S1: Thermal testing results**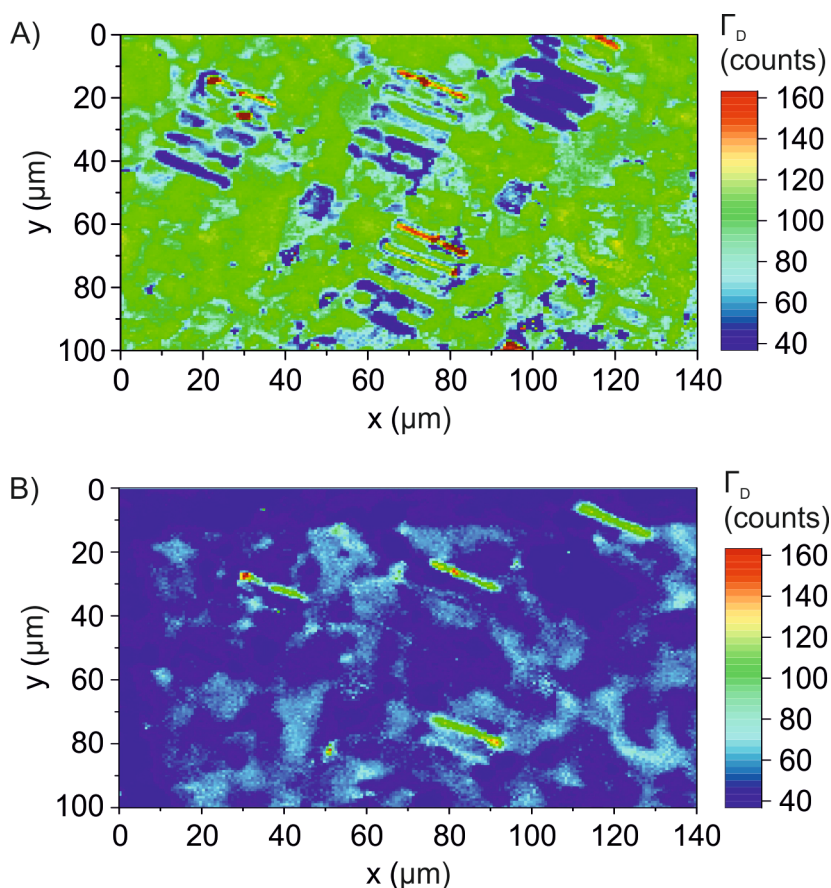

**Figure S1:** Scanning Raman maps of oxo-G patterned at elevated temperatures: 30 °C (top left), 40 °C (top center), 50 °C (top right), 60 °C (bottom center) show no pronounced differences, indicating that the reduction process is not a thermally activated process in the investigated temperature range.

## References:

- S1. S. Eigler, M. Enzelberger-Heim, S. Grimm, P. Hofmann, W. Kroener, A. Geworski, C. Dotzer, M. Rockert, J. Xiao, C. Papp, O. Lytken, H. P. Steinrück, P. Müller and A. Hirsch, *Adv. Mater.*, 2013, **25**, 3583-3587.
- S2. B. Butz, C. Dolle, C. E. Halbig, E. Spiecker and S. Eigler, *Angew. Chem. Int. Ed.*, **2016**, *55*, 15771-15774.
- S3. C. E. Halbig, P. Rietsch and S. Eigler, *Molecules*, 2015, **20**, 21050-21057.
- S4. S. Eigler, C. Dotzer, F. Hof, W. Bauer and A. Hirsch, *Chem. Eur. J.*, 2013, **19**, 9490-9496.
- S5. S. Eigler, *Phys. Chem. Chem. Phys.*, 2014, **16**, 19832-19835.
- S6. S. Eigler, F. Hof, M. Enzelberger-Heim, S. Grimm, P. Müller and A. Hirsch, *J. Phys. Chem. C*, 2014, **118**, 7698-7704.
